# Supplementary material for: Structural analysis of Cytochrome P450 BM3 mutant M11 in complex with dithiothreitol
Source: PLOS journal article supplement (doi:10.1371/journal.pone.0217292), 2019-05-24
Supplement: S6 (10.1371/journal.pone.0217292.s006) [file journal.pone.0217292.s006]

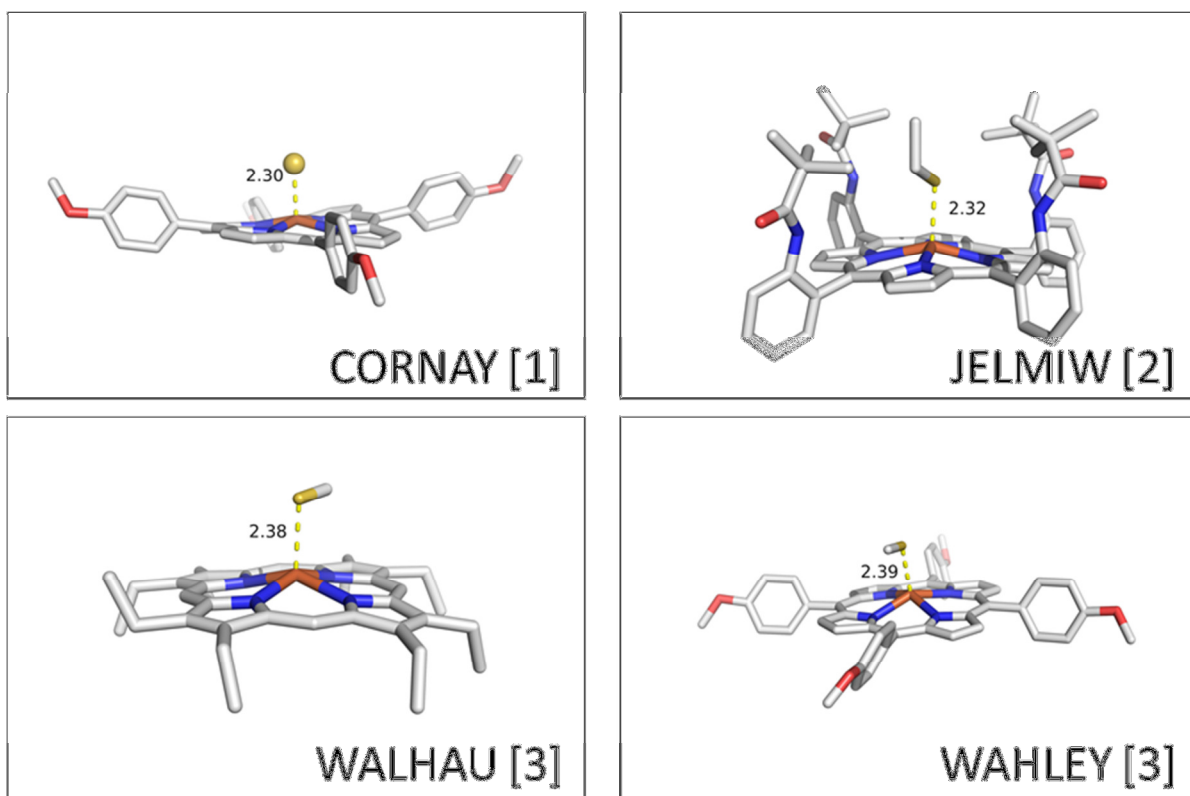

**S6 Fig. Structures from the Cambridge Structural Database containing a porphyrin ring with axial sulfur-containing compounds. CORNAY, JELMIW, WALHAU, and WAHLEY.**
